# Supplementary material for: Global prevalence of methane oxidation by symbiotic bacteria in peat-moss ecosystems
Source: Springer Nature journal article supplement (doi:10.1038/ngeo939), 2010-08-22
Supplement: 41561_2010_BFngeo939_MOESM186_ESM.pdf [file 41561_2010_BFngeo939_MOESM186_ESM.pdf]

## Supporting Online Material for

### Global prevalence of symbiotic bacterial methane oxidation in peat moss ecosystems

Nardy Kip, Julia F. van Winden, Yao Pan, Levente Bodrossy, Gert-Jan Reichart, Alfons J.P. Smolders, Mike S.M. Jetten, Jaap S. Sinninghe Damsté & Huub J.M. Op den Camp

#### This PDF file includes:

Supplementary Materials and Methods  
Supplementary Tables S1 and S2  
Supplementary Figures S1, S2 and S3

---

#### Supplementary Materials and Methods

##### Sample collection

Intact *Sphagnum* mosses were collected from nine different peat lands around the world (Supplementary Table S1). Whole and alive, chlorophyll containing mosses were used. When possible, mosses from pool, lawn and hummock were sampled.

##### Methane oxidizing activity tests

Intact *Sphagnum* mosses were thoroughly washed 3 times with sterile demineralised water, and incubated in 120 ml serum bottles, sealed with airtight, butyl rubber stoppers. To each bottle 1 ml pure methane was added and methane concentrations were monitored daily. Incubation was performed at 4, 10, 15 and 20°C in the dark. When available, peat bog water was tested for methane oxidation. Methane was measured on a HP 5890 gas chromatograph equipped with a flame ionization detector and a Porapak Q column (100/120 mesh). Acetylene addition, irreversibly stopping methane oxidation, was performed with samples from the Mariapeel and Hatertse Vennen.

##### Methane emission measurements

9 Peat cores (diameter: 15 cm, length 40 cm) were taken from very wet *Sphagnum cuspidatum* dominated hollows from two different peatlands (Tuspeel (51°19'92"N; 5°88'29"E) en Haaksbergerveen (52°13'01"N; 6°77'27"E), The Netherlands). Approximately the upper 10 cm of the cores consisted of living *Sphagnum* moss. The peat cores were filled with water till the top and methane emissions were measured at 18 °C. After a month of pre-incubation at ambient light levels and 18 °C, methane emission rates were measured by means of a funnel (diameter 12.5 cm) closed with a rubber stopper, which was placed upside-down onto the water surface of the column. Accumulation of CH<sub>4</sub> under the funnel was measured every 2 h over a period of 12 h by

carefully taking air samples with syringes. As CH<sub>4</sub> concentration showed a linear increase, methane emission could be calculated by simple linear regression. Afterwards the upper 6 cm of the living parts of the *Sphagnum* mosses were carefully cut away and two days later methane emissions were measured again.

### <sup>13</sup>CH<sub>4</sub> and <sup>13</sup>CO<sub>2</sub> incorporation into lipids

Submerged labelling experiments were performed as described previously<sup>3</sup> on *S. cuspidatum* from the UK, *S. magellanicum* from Argentina and *S. magellanicum* from Canada. Briefly, intact *Sphagnum* mosses were thoroughly washed and incubated in 250 ml serum bottles, submerged in 150 ml medium resembling bog water, after which 99% <sup>13</sup>C-labelled methane was added to a final concentration of 200 μM. In parallel <sup>13</sup>CO<sub>2</sub> experiments were performed with the Canadian mosses in the same way as described above, with non labelled methane and the addition of 4.2 mg of labelled sodium bicarbonate. Phosphoric acid was used to adjust the pH to 4.5 in all experiments. The bottles were shaken at 150 rpm at ambient conditions, and sacrificed for lipid analyses at two points in time. Control experiments, where *Sphagnum*, was incubated in air, were performed as described in the previous section, except with 99% <sup>13</sup>C labelled methane. Measurements of CO<sub>2</sub> and CH<sub>4</sub> were performed on a GC/MS (5975C, Agilent technologies).

Total lipid extracts of freeze-dried *Sphagnum* species were obtained with an Accelerated Solvent Extractor (Dionex), using a mixture of dichloromethane (DCM):methanol (MeOH) (9:1, v/v). An aliquot of the total extract was methylated with borontrifluoride-methanol (BF<sub>3</sub>/MeOH) at 60 °C for 20 min, after which it was separated into three increasingly polar fractions over an activated Al<sub>2</sub>O<sub>3</sub> column using hexane:DCM (9:1 v/v), DCM and DCM:MeOH (1:1 v/v), respectively. The DCM:MeOH (1:1 v/v) fraction was subsequently silylated with a 1:1 mixture of bis(trimethylsilyl)trifluoroacetamide (BSTFA) (1% TMS) and pyridine at 60 °C for 20 min. An aliquot of the total extract was treated with H<sub>5</sub>IO<sub>6</sub> and NaBH<sub>4</sub>, as described by Rohmer et al. (1984)<sup>10</sup>, to cleave the C-C bonds of vicinal polyols, and subsequently silylated.

Fractions were analyzed on a gas chromatograph (HP 6890) equipped with a flame ionization detector (FID) set at constant pressure (100 kPa). A fused silica column (30 m x 0.32 mm i.d., film thickness 0.1 μm) coated with CP Sil-5CB was used with helium as a carrier gas. Extracts were injected on-column at 70 °C. The temperature increased with 20 °C/min to 130 °C and 4 °C/min to 320 °C, followed by an isothermal hold for 20 min. Components were identified using a gas chromatograph–mass spectrometer (Thermo Trace GC Ultra).

Compound specific δ<sup>13</sup>C values were determined by Isotope-Ratio-Monitoring Gas Chromatography Mass Spectrometry (GC-IRMS, ThermoFinnigan Delta-Plus XP). Carbon isotopic values are reported in the delta notation relative to the VPDB standard. The δ<sup>13</sup>C values of the alcohols were corrected for the attached TMS groups derived from BSTFA, which were determined offline.

The extent of methane-derived CO<sub>2</sub> incorporation was estimated by comparing label uptake in phytosterol (measured value minus the natural isotope abundance) to the enrichment the <sup>13</sup>CO<sub>2</sub> treated sample, through time. The isotope ratios of the gases were monitored through time. The experiment in which *Sphagnum* was incubated with <sup>13</sup>CH<sub>4</sub> showed gradual build up of <sup>13</sup>CO<sub>2</sub>, up to 16%, in the headspace. This was

corrected for using the effect calculated based on the parallel  $^{13}\text{C}$  labelling experiment. Differences in label in  $\text{CO}_2$  and  $\text{CH}_4$ , changes therein over time, and differences in duration of experiments, were accounted for. The calculation was as follows, where  $\Delta^{13}\text{C}$  stands for the enrichment in  $^{13}\text{C}$  in plant sterol relative to the natural isotopic abundance, in atomic percentages (corrected for %  $^{13}\text{C}$  in the substrate and duration of the experiment):  $\Delta^{13}\text{C}_{\text{CH}_4} + \Delta^{13}\text{C}_{\text{CO}_2} = 100\%$ . The  $\Delta^{13}\text{C}_{\text{CH}_4}$  was obtained when the measured  $\Delta^{13}\text{C}_{\text{CH}_4}$  was subtracted by the amount of  $^{13}\text{C}$  incorporated as a result of build up of labeled  $\text{CO}_2$  in the headspace derived from methanotrophic respiration:  $\Delta^{13}\text{C}_{\text{CH}_4} = \Delta^{13}\text{C}_{\text{CH}_4 \text{ measured}} - \Delta^{13}\text{C}_{\text{CH}_4\text{-derived CO}_2}$  in which  $\Delta^{13}\text{C}_{\text{CH}_4\text{-derived CO}_2} = \left( \frac{^{13}\text{CO}_2 \text{ headspace}}{^{13}\text{CH}_4 \text{ exp}} / \frac{^{13}\text{CO}_2 \text{ headspace}}{^{13}\text{CO}_2 \text{ exp}} \right) * \Delta^{13}\text{C}_{\text{CO}_2}$ . The %  $^{13}\text{C}$  in  $\text{CO}_2$  and in  $\text{CH}_4$  was 24% and 51%, respectively, which was accounted for. Also the duration of the  $^{13}\text{CO}_2$  incubation was 7 days compared to the  $^{13}\text{CH}_4$  incubation of 9 days for which was corrected as well.

### $^{13}\text{CH}_4$ incorporation into chlorophyll

Analyses of methane-derived  $^{13}\text{C}$  incorporation into chlorophyll-*a* was performed with *S. cuspidatum* collected from the Mariageel, the Netherlands. *Sphagnum* mosses were washed with demineralised water and incubated in 250 ml serum bottles. In each bottle, seven *S. cuspidatum* plants were incubated. Subsequently, 130  $\mu\text{mol}$  of 99%  $^{13}\text{C}$ -labelled methane was added after which the bottles were incubated in the light. In the control treatment the same amount of  $^{12}\text{C}$ -labelled methane was added. After two weeks chlorophyll-*a* was extracted and purified using thin layer chromatography (TLC, on silicagel-60 Merck). Chlorophyll-*a* spots were scraped from the silicagel and eluted with ethanol. Isotope fractions of chlorophyll-*a* molecules were analysed with a Matrix-Assisted Laser Desorption Ionization-Time of Flight (MALDI-TOF) mass-spectrometer (type Bruker Biflex III, reflection mode) with alfa-cyano-5-hydroxy-cinnamic acid (CCA) as the matrix.

### gDNA isolation

*Sphagnum* mosses were washed with sterile demineralised water and stored at  $-20^\circ\text{C}$ . Frozen mosses were grinded to powder in a mortar with liquid nitrogen, of which 5 ml were transferred to a 50 ml tube. PBS buffer was added and SDS and NaCl were added to a final concentration of 2% and 1M, respectively. One volume of phenol : chloroform : isoamylalcohol (25:24:1) was added and incubated at  $65^\circ\text{C}$  for 2 h. After centrifugation for 20 min at 4000 rpm, the water phase was transferred into a new vial and combined with 1 volume chloroform:isoamylalcohol (24:1), after which it was mixed and centrifuged for 20 min at 4000 rpm. From the aqueous phase was, genomic DNA precipitated after adding 0.1 volume 3 M NaAc (pH 4.8) and 2 volumes of ethanol (100%). After incubation for 30 min at  $-20^\circ\text{C}$ , the mixture was centrifuged for 20 min at 4000 rpm. The pellet was washed with 70% EtOH and dissolved in 0.5 ml MQ. The gDNA was purified by incubating the DNA with RNase for 15 min  $37^\circ\text{C}$ . Humic acids were removed by adding 500  $\mu\text{l}$  Sephaglass bead suspension of the FlexiPrep Kit (Pharmacia P-L Biochemicals Inc.) and incubated for 1 min. Glass beads with bound DNA were washed twice with buffer and finally with 70% ethanol. The pellet was dried and DNA was dissolved in MQ. gDNA was stored at  $4^\circ\text{C}$ .

## Microarray

*pmoA* based microarray was performed as described previously<sup>8</sup>, except the *pmoA* based PCR. Genomic DNA extracted from *Sphagnum* mosses was used as template in a touchdown PCR with the *pmoA* primer set a189/T7-A682. The PCR programme: 94°C for 5 min, 11 cycles of 1 min 94°C, 1 min 62°C with decrease of 1°C every cycle, 1 min 72°C, followed by 25 cycles of 1 min 94°C, 1 min 52°C, 1 min 72, followed by 10 min 72°C. This PCR product was diluted 100 times and used for a nested *pmoA* touchdown PCR with the A189/T7-mb661 following programme: 94 °C for 5 min, 11 cycles of 1 min 94 °C, 1 min 62°C with decrease of 1 °C every cycle, 1 min 72°C, followed by 14 cycles of 1 min 94 °C, 1 min 52°C, 1 min 72, followed by 10 min 72°C.

## *mmoX* PCR

The *mmoX* based PCRs were performed using the primer sets *mmoX1-mmoX2* (touchdown PCR 70-60 °C)<sup>28</sup>, f882-r1403<sup>29</sup> and A-B<sup>30</sup>, also called f166-r1401 and the combinations f882-B and A-r1403 (all touchdown PCR 63-53 °C). The same PCR program as described for the first PCR for the microarray has been used.

**Supplementary Table S1 | Overview of sampling locations of collected *Sphagnum* mosses.**

| Country     | Sample site       | Coordinates                | Sampling time                            | Sample name          |
|-------------|-------------------|----------------------------|------------------------------------------|----------------------|
| Netherlands | Mariapeel         | 51° 24' 90"N; 5° 54' 90"E  | December 2006, January 2007, May 2008    | Mariapeel (MP)       |
|             | Hatertse Vennen   | 51° 47' 4"N; 5° 48' 2"E    | May 2007, May 2008                       | Hatertse Vennen (HV) |
| UK          | Bodmin moor       | 50° 27' 59"N; 4° 43' 32"W  | January 2008                             | England              |
| Russia      | Northern Siberia  | 70° 37'N; 147° 53'E        | July 2008                                | Northern Siberia     |
|             | Western siberia   | 60° 53' 26"N; 68° 41' 20"E | July 2008                                | Western Siberia      |
| Canada      | La mer bleue      | 45° 22'N; 75° 30'W         | October 2008                             | Canada               |
| Germany     | Hespermoor        | 52° 25' 60"N; 7° 10' 60"E  | September 2008                           | Germany              |
| Sweden      | Abisko, Stordalen | 68° 20'N, 19° 00'E         | October 2008                             | Sweden               |
| Argentina   | Av peat           | 54° 48'S 68° 18'W          | December 2007, February 2008, April 2008 | Tierra del fuego     |

**Supplementary Table S2 | Probes used for microarray analysis.** Column numbers correspond to the order in which the probes are arranged on the microarray analysis shown in Figure 3.

| Number | Name         | Intended specificity                                                                                                           |
|--------|--------------|--------------------------------------------------------------------------------------------------------------------------------|
| 1      | MbA557       | <i>Methylobacter</i>                                                                                                           |
| 2      | MbA486       | <i>Methylobacter</i>                                                                                                           |
| 3      | Mb460        | <i>Methylobacter</i>                                                                                                           |
| 4      | Mb_LW12-211  | <i>Methylobacter</i>                                                                                                           |
| 5      | Mb_SL#3-300  | <i>Methylobacter</i>                                                                                                           |
| 6      | Mb_SL299     | soda lake <i>Methylobacter</i> isolates and clones                                                                             |
| 7      | Mb_SL#1-418  | soda lake <i>Methylobacter</i> isolates and clones                                                                             |
| 8      | MmbB284      | <i>Mmb. Buryatense</i> - same region as <i>Jpn284</i> , but 3 MM vs. that one <i>Methylobacter</i> and Japanese strain related |
| 9      | Jpn284       | clone Jpn 07061                                                                                                                |
| 10     | BB51-302     | <i>Methylobacter</i>                                                                                                           |
| 11     | Mb267        | <i>Methylobacter</i>                                                                                                           |
| 12     | Mb292        | <i>Methylobacter</i>                                                                                                           |
| 13     | Mb282        | <i>Methylobacter</i>                                                                                                           |
| 14     | Mb_URC278    | <i>Methylobacter</i>                                                                                                           |
| 15     | 511-436      | <i>Methylobacter</i>                                                                                                           |
| 16     | LP10-424     | <i>Methylobacter</i> LP 10 group                                                                                               |
| 17     | LF1a-456     | <i>Methylobacter</i> LF 1a group                                                                                               |
| 18     | Mb_C11-403   | <i>Methylobacter</i>                                                                                                           |
| 19     | Mb380        | <i>M.bacter</i> broad group <i>A</i> universal?                                                                                |
| 20     | Mb271        | <i>Methylobacter</i>                                                                                                           |
| 21     | S14m2-270    | Marine type <i>Ia</i> cluster, <i>S14m#2</i>                                                                                   |
| 22     | S14m2-406    | Marine type <i>Ia</i> cluster, <i>S14m#2</i>                                                                                   |
| 23     | PS80-291     | clone PS-80                                                                                                                    |
| 24     | MS1-440      | Marine type <i>Ia</i> cluster, Marine sediment #1                                                                              |
| 25     | Mm_pel467    | <i>Methylomicrobium pelagicum</i>                                                                                              |
| 26     | Kuro18-205   | Marine type <i>Ia</i> cluster, <i>Kuro18</i>                                                                                   |
| 27     | DS1-401      | Deep sea cluster #1                                                                                                            |
| 28     | Mm531        | <i>Methylomonas</i>                                                                                                            |
| 29     | Mm_M430      | <i>Methylomonas</i>                                                                                                            |
| 30     | Mm_RS311     | <i>Mm.methanica</i> , <i>RS</i> clade(10-286)                                                                                  |
| 31     | Mm_ES294     | <i>Methylomonas</i>                                                                                                            |
| 32     | Mm_ES543     | <i>Methylomonas</i>                                                                                                            |
| 33     | Mm_ES546     | <i>Methylomonas</i>                                                                                                            |
| 34     | Mm_MV421     | <i>Methylomonas</i>                                                                                                            |
| 35     | Mm451        | <i>Methylomonas</i>                                                                                                            |
| 36     | Mm275        | <i>Methylomonas</i>                                                                                                            |
| 37     | Alp7-441     | Alpine soil <i>Methylomonas</i> , <i>Alp#7</i> (10-282)                                                                        |
| 38     | peat_1_3-287 | <i>Methylomonas</i> -related peat clones                                                                                       |
| 39     | Est514       | <i>Methylomicrobium</i> -related clones                                                                                        |
| 40     | Mmb259       | <i>Methylomicrobium album</i> + Landfill <i>M.microbia</i>                                                                     |
| 41     | Mmb303       | <i>Methylomicrobium album</i>                                                                                                  |
| 42     | Mmb304       | <i>Methylomicrobium album</i> + Landfill <i>M.microbia</i> and related                                                         |

|    |             |                                                                                    |
|----|-------------|------------------------------------------------------------------------------------|
| 43 | LW14-639    | <i>Methylomicrobium LW14 group</i>                                                 |
| 44 | Mmb_RS2-443 | <i>Methylomicrobium, Mmb_RS2</i>                                                   |
| 45 | Mmb562      | <i>Mmb. album</i> and <i>Methylosarcina</i>                                        |
| 46 | Mm229       | <i>Deep-branching M.monas (?) group (WHmb3 related group)</i>                      |
| 47 | MsQ290      | <i>M.sarcina quisquiliarum</i> related                                             |
| 48 | MsQ295      | <i>M.sarcina quisquiliarum</i>                                                     |
| 49 | LP20-644    | <i>Methylomicrobium</i> -related clones                                            |
| 50 | LP20-607    | <i>LP20 group (Type Ia, deep branching-Mmb?)</i>                                   |
| 51 | Ia193       | Type I a ( <i>M.bacter-M.monas-M.microbium</i> )                                   |
| 52 | Ia575       | Type I a ( <i>M.bacter-M.monas-M.microbium-M.sarcina</i> )                         |
| 53 | Bsed516     | Marine sediment #2, <i>Bsed</i>                                                    |
| 54 | SWI1-375    | Marine sediment #2, <i>SW#1</i>                                                    |
| 55 | SWI1-377    | Marine sediment #2, <i>SW#1</i>                                                    |
| 56 | Nc_oce426   | <i>Nitrosococcus oceani</i>                                                        |
| 57 | DS2-287     | Deep sea #2, subgroup ( <i>N.coccus</i> and Deep sea Type Ia 10-298)               |
| 58 | AIMS1-442   | Deep sea #2, <i>AIMS#1</i>                                                         |
| 59 | DS2-220     | Deep sea #2, subgroup                                                              |
| 60 | DS2-626     | Deep sea #2, subgroup                                                              |
| 61 | USCG-225    | Upland soil cluster Gamma                                                          |
| 62 | USCG-225b   | Upland soil cluster Gamma                                                          |
| 63 | JR2-409     | JR cluster #2 (California upland grassland soil)                                   |
| 64 | JR2-468     | JR cluster #2 (California upland grassland soil)                                   |
| 65 | JR3-505     | JR cluster #3 (California upland grassland soil)                                   |
| 66 | JR3-593     | JR cluster #3 (California upland grassland soil)                                   |
| 67 | 501-375     | <i>Methylococcus</i> - related marine and freshwater sediment clones               |
| 68 | 501-286     | <i>Methylococcus</i> - related marine and freshwater sediment clones               |
| 69 | USC3-305    | Upland soil cluster #3                                                             |
| 70 | Mc396       | <i>Methylococcus</i>                                                               |
| 71 | MclT272     | <i>Methylocaldum tepidum</i>                                                       |
| 72 | MclG281     | <i>Methylocaldum gracile</i>                                                       |
| 73 | MclS402     | <i>Methylocaldum szegediense</i>                                                   |
| 74 | MclS394     | <i>Methylocaldum szegediense</i> and related                                       |
| 75 | MclS400     | <i>Methylocaldum szegediense</i> and related                                       |
| 76 | MclE302     | <i>Methylocaldum</i> E10                                                           |
| 77 | Mcl404      | <i>Mc.capsulatus-Mcl.tepidum-Mcl. Gracile-Mcl.Szeg</i> and related                 |
| 78 | Mcl408      | <i>Methylocaldum</i>                                                               |
| 79 | fw1-286     | fw-1 group: <i>M.coccus-M.caldum</i> related marine and freshwater sediment clones |
| 80 | fw1-639     | fw-1 group: <i>M.coccus-M.caldum</i> related marine and freshwater sediment clones |
| 81 | fw1-641     | fw-1 group: <i>M.coccus-M.caldum</i> related marine and freshwater sediment clones |
| 82 | JHTY1-267   | <i>JH-TY#1</i>                                                                     |
| 83 | JRC4-432    | Japanese rice cluster #4                                                           |
| 84 | OSC220      | Finnish organic soil clones and related                                            |
| 85 | OSC300      | Finnish organic soil clones and related                                            |
| 86 | JRC3-535    | Japanese Rice Cluster #3                                                           |
| 87 | LK580       | fw-1 group + Lake Konstanz sediment cluster                                        |
| 88 | RSM1-419    | <i>RSM#1</i>                                                                       |

|     |           |                                                                                      |
|-----|-----------|--------------------------------------------------------------------------------------|
| 89  | JHTY2-562 | <i>JH-TY#2</i>                                                                       |
| 90  | JHTY2-578 | <i>JH-TY#2</i>                                                                       |
| 91  | JRC2-447  | Japanese Rice Cluster #2                                                             |
| 92  | LW21-374  | LW21 group                                                                           |
| 93  | LW21-391  | LW21 group                                                                           |
| 94  | M90-574   | <i>M.coccus-M.caldum</i> related marine and freshwater sediment clones               |
| 95  | M90-253   | <i>M.coccus-M.caldum</i> related marine and freshwater sediment clones               |
| 96  | Mth413    | <i>Methylothermus</i>                                                                |
| 97  | Mha-500   | <i>Methylohalobius - M.thermus</i> and related ?                                     |
| 98  | DS3-446   | Deep sea cluster #3                                                                  |
| 99  | PmoC640   | <i>PmoC</i>                                                                          |
| 100 | PmoC308   | <i>PmoC</i>                                                                          |
| 101 | Ib453     | Type I b ( <i>M.thermus-M.coccus-M.caldum</i> and related)                           |
| 102 | Ib559     | Type I b ( <i>M.thermus-M.coccus-M.caldum</i> and related)                           |
| 103 | McyB304   | <i>M.cystis B (parvus/echinoides/strain M)</i>                                       |
| 104 | Mcy255    | <i>M.cystis B (parvus/echinoides/strain M)</i>                                       |
| 105 | Mcy459    | <i>Methylocystis</i>                                                                 |
| 106 | Mcy264    | <i>Methylocystis</i>                                                                 |
| 107 | Mcy270    | <i>Methylocystis</i>                                                                 |
| 108 | Mcy413    | <i>Methylocystis</i>                                                                 |
| 109 | Mcy522    | <i>Methlocystis A</i> + peat clones                                                  |
| 110 | Mcy233    | <i>Methylocystis</i>                                                                 |
| 111 | McyM309   | <i>M.cystis strain M</i> and related                                                 |
| 112 | Peat264   | peat clones                                                                          |
| 113 | MsS314    | <i>Methylosinus sporium</i>                                                          |
| 114 | MsS475    | <i>Methylosinus sporium</i>                                                          |
| 115 | Msi263    | <i>Methylosinus sporium</i> + 1 <i>Msi.trichosporium</i> subclaster                  |
| 116 | Msi423    | <i>Methylosinus</i>                                                                  |
| 117 | MsT214    | <i>Methylosinus trichosporium</i> OB3b and rel.                                      |
| 118 | Msi520    | <i>Methylosinus trichosporium</i>                                                    |
| 119 | Msi269    | <i>Methylosinus trichosporium</i>                                                    |
| 120 | Msi294    | <i>Methylosinus</i>                                                                  |
| 121 | ARC2-518  | Deep branching type II clade ARC2 - <i>Methylosinus trichosporium</i> 15-084 group?  |
| 122 | Msi232    | <i>M.sinus</i> + most <i>M.cystis</i> -considered as additional <u>type II</u> probe |
| 123 | II509     | Type II                                                                              |
| 124 | II630     | Type II                                                                              |
| 125 | Alp8-468  | Type II novel <i>pmoA</i> , Alpine cluster Alp#8                                     |
| 126 | xb6-539   | Novel <i>pmoA</i> copy of type II and related environmental clones                   |
| 127 | LP21-190  | Novel <i>pmoA</i> copy of type II and related environmental clones                   |
| 128 | LP21-260  | Novel <i>pmoA</i> copy of type II and related environmental clones                   |
| 129 | NMcy1-247 | Novel <i>pmoA</i> copy of <i>M.cystis</i> #1 (?)                                     |
| 130 | NMsi1-469 | Novel <i>pmoA</i> copy of <i>M.sinus</i>                                             |
| 131 | NMcy2-262 | Novel <i>pmoA</i> copy of <i>M.cystis</i> #2 (?)                                     |
| 132 | LP21-436  | <i>Mcy</i> + <i>Msi</i> novel <i>pmoA</i> #1 groups                                  |
| 133 | NMsiT-271 | Novel <i>pmoA</i> copy of <i>M.sinus trichpsporium</i> (?)                           |
| 134 | LP21-232  | Novel <i>pmoA</i> copy of type II and related environmental clones                   |
| 135 | RA14-299  | RA14 related clones                                                                  |
| 136 | RA14-594  | RA14 related clones                                                                  |



|     |             |                                                                     |
|-----|-------------|---------------------------------------------------------------------|
| 137 | RA14-591    | RA14 related clones                                                 |
| 138 | Wsh1-566    | Watershed + flodded upland cluster 1                                |
| 139 | Wsh2-491    | Watershed + flodded upland cluster 2                                |
| 140 | Wsh2-450    | Watershed + flodded upland cluster 2                                |
| 141 | B2rel251    | <i>Methylocapsa</i> -related clones                                 |
| 142 | B2-400      | <i>Methylocapsa</i>                                                 |
| 143 | B2-261      | <i>Methylocapsa</i>                                                 |
| 144 | B2all343    | <i>Methylocapsa</i> and related clones                              |
| 145 | B2all341    | <i>Methylocapsa</i> and related clones                              |
| 146 | pmoAMO3-400 | clone pmoA-MO3                                                      |
| 147 | pmoAMO3-486 | <i>MO3</i> group                                                    |
| 148 | pmoAMO3-511 | <i>MO3</i> group                                                    |
| 149 | Ver330      | <i>Verrucomicrobia</i> , all <i>pmoA1</i> + <i>pmoA2</i>            |
| 150 | Ver307      | <i>Verrucomicrobia</i> , all <i>pmoA2</i>                           |
| 151 | Ver285      | <i>Verrucomicrobia</i> , <i>Ma.fum pmoA2</i> + <i>Ma.kam. pmoA2</i> |
| 152 | Ma_F1-594   | <i>Ma.fum. pmoA1</i>                                                |
| 153 | Ma_I1-312   | <i>Ma.inf. pmoA1</i>                                                |
| 154 | Ma_I1-401   | <i>Ma.inf. pmoA1</i>                                                |
| 155 | Ma_F3-638   | <i>Ma.fum. pmoA3</i>                                                |
| 156 | Ma_F3-542   | <i>Ma.fum. pmoA3</i>                                                |
| 157 | ESR-579     | ESR (Eastern Snake River) cluster                                   |
| 158 | M84P22-514  | environmental clones of uncertain identity                          |
| 159 | TUSC409     | Tropical Upland Soil Cluster #2                                     |
| 160 | TUSC502     | Tropical Upland Soil Cluster #2                                     |
| 161 | mtrof173    | Universal                                                           |
| 162 | mtrof362-I  | Methanotrophs                                                       |
| 163 | mtrof661    | Methanotrophs                                                       |
| 164 | mtrof662-I  | Methanotrophs                                                       |
| 165 | mtrof656    | Methanotrophs                                                       |

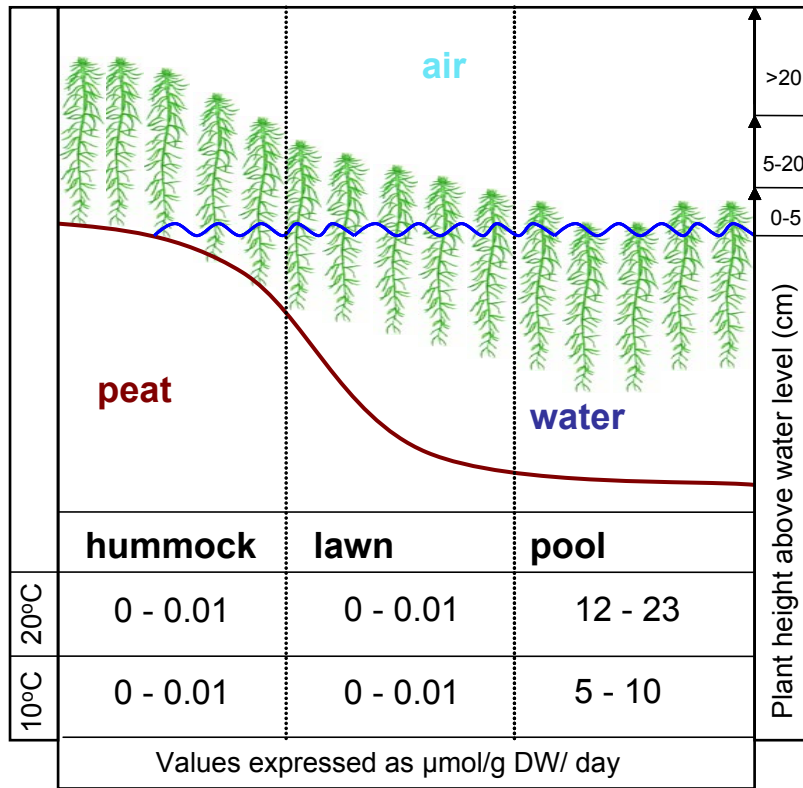

**Supplementary Figure S1 | Methane oxidation rates at different temperatures.**

Schematic representation of the three different tested vegetation types, all *Sphagnum magellanicum*, with the average methane oxidation rates (in  $\mu\text{mol/gDW/day}$ ) found in Tierra del Fuego at two different temperatures. Values are means of at least 6 incubations  $\pm$  S.D.

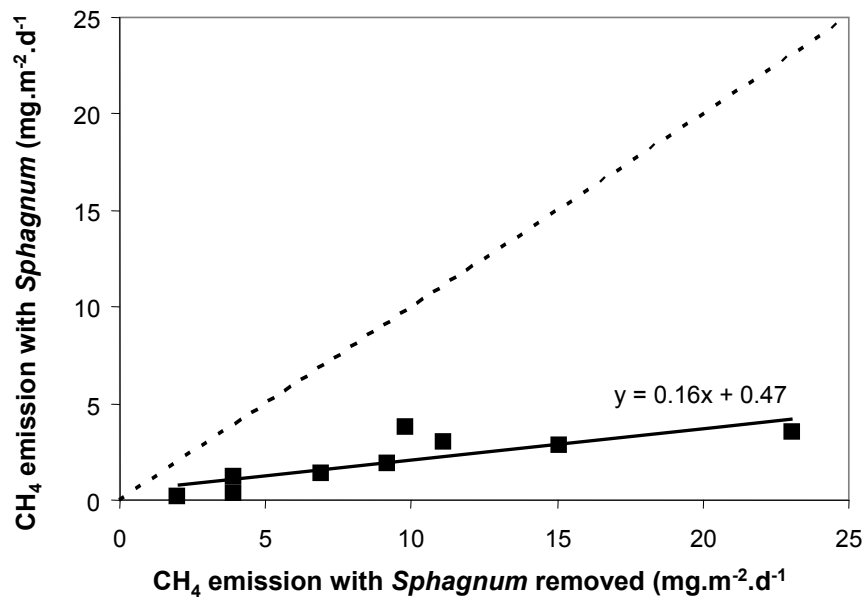

**Supplementary Figure S2 | Comparison of methane emission from peat cores before and after removal of the *Sphagnum* layer.** Emissions were determined from 9 different cores. Emission with *Sphagnum* was plotted against the emission after removal. The dotted line indicates the trend when no changes in methane oxidation rates would have occurred.

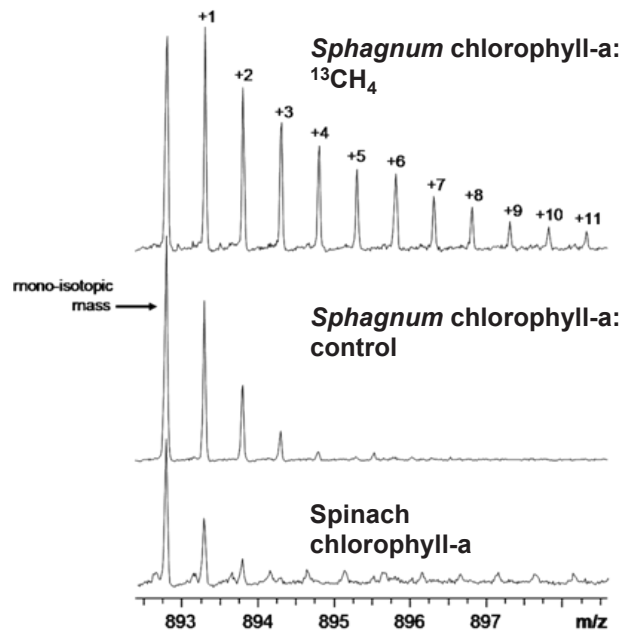

**Supplementary Figure S3 | <sup>13</sup>C enrichment of chlorophyll-a extracted from *S. cuspidatum*.** MALDI-TOF spectra of chlorophyll-a extracted from *S. cuspidatum* (Mariapeel, The Netherlands) incubated with 99% <sup>13</sup>C-labelled methane (top), compared to natural <sup>13</sup>C abundance in *Sphagnum* (middle) and spinach (bottom). The spectra show the relative abundance of chlorophyll-a with a mono-isotopic mass (100% <sup>12</sup>C) and chlorophyll-a containing one <sup>13</sup>C, two <sup>13</sup>C, three <sup>13</sup>C etc. consecutively.
